# Supplementary figures and images for: Germplasm Resources of Oaks (Quercus L.) in China: Utilization and Prospects
Source: MDPI journal article supplement (doi:10.3390/biology12010076), 2022-12-31

# *Quercus acutissima*

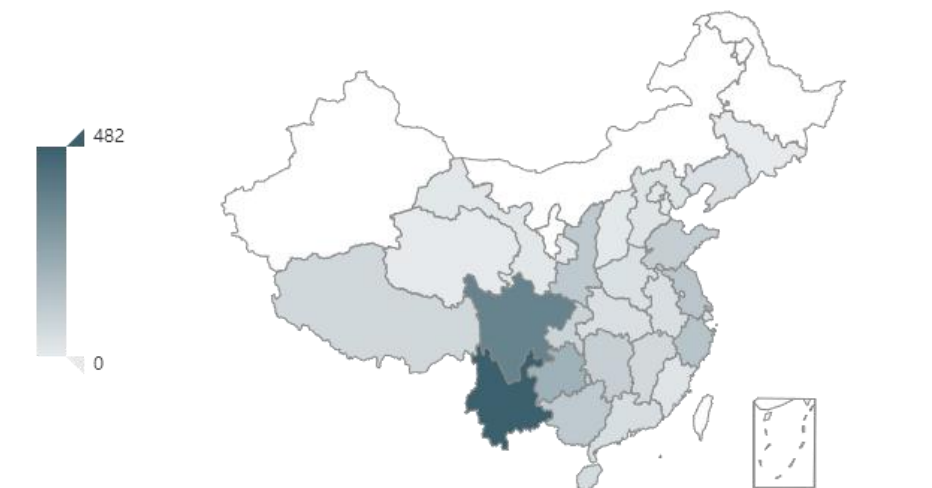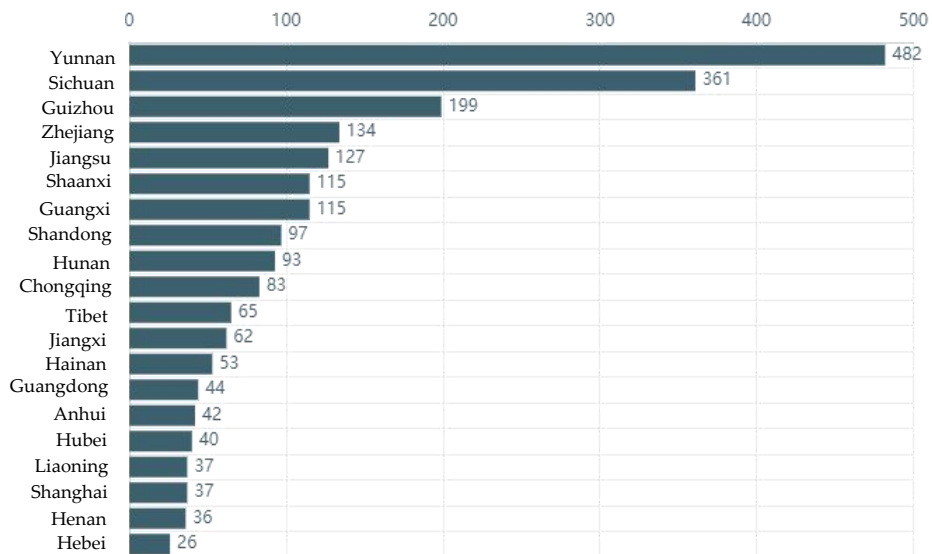

# *Quercus dentata*

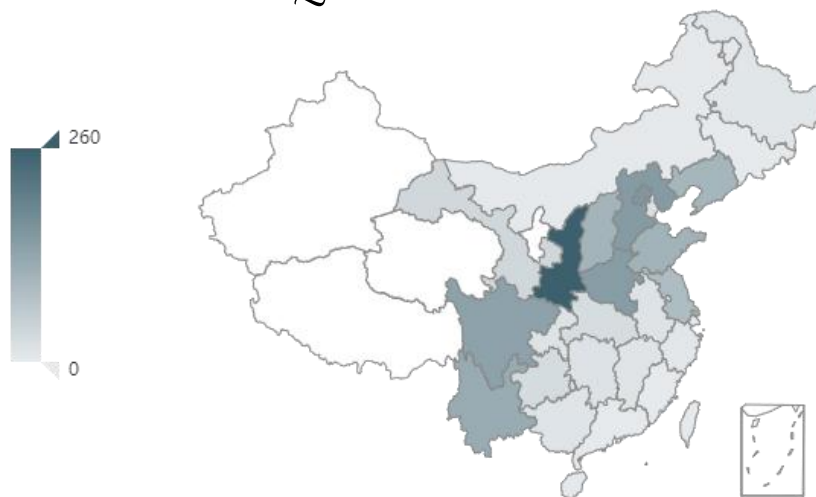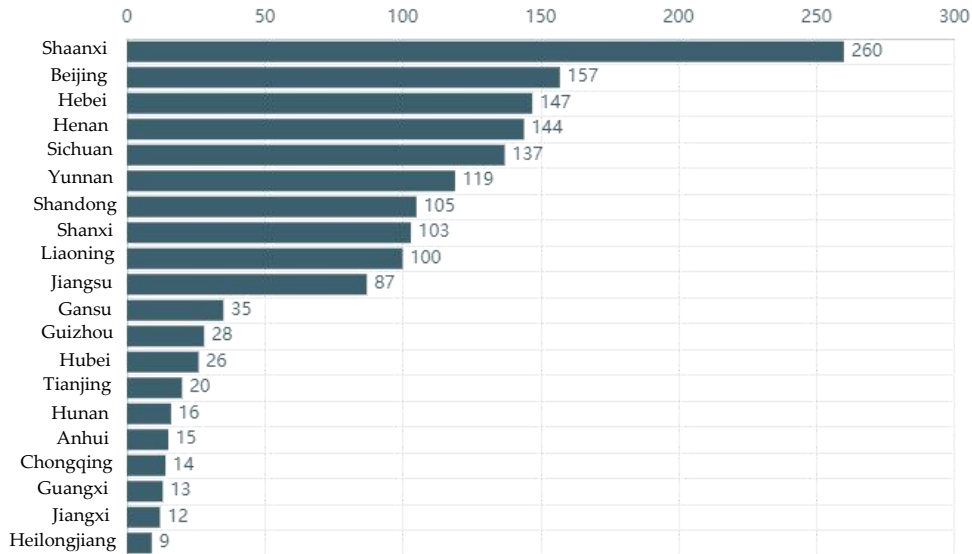

Supplement Figure S1

Top 20 provinces of samples collected

Supplement: s1 [file s1]
